# Supplementary material for: Nonvitamin K Antagonist Oral Anticoagulants Versus Warfarin in Atrial Fibrillation Patients and Risk of Dementia: A Nationwide Propensity‐Weighted Cohort Study
Source: PubMed Central journal article supplement (PMC6585353; doi:10.1161/jaha.118.011358), 2019-05-29

# **SUPPLEMENTAL MATERIAL**

**Table S1. Definitions on comorbidity and concomitant medication according to ICD-10 codes and ATC-codes.**

| <b>Disease</b>                                 | <b>ICD-8 codes</b>                            | <b>ICD-10 codes</b>                                                                                                                                       | <b>ATC-code</b> |
|------------------------------------------------|-----------------------------------------------|-----------------------------------------------------------------------------------------------------------------------------------------------------------|-----------------|
| <b>Study population</b>                        |                                               |                                                                                                                                                           |                 |
| AF                                             | 42793 42794                                   | I48                                                                                                                                                       |                 |
| <b>Exposure</b>                                |                                               |                                                                                                                                                           |                 |
| Warfarin                                       |                                               |                                                                                                                                                           | B01AA03         |
| Dabigatran                                     |                                               |                                                                                                                                                           | B01AE07         |
| Rivaroxaban                                    |                                               |                                                                                                                                                           | B01AF01         |
| Apixaban                                       |                                               |                                                                                                                                                           | B01AF02         |
| <b>Outcome</b>                                 |                                               |                                                                                                                                                           |                 |
| Dementia                                       |                                               |                                                                                                                                                           |                 |
| Alzheimer's disease                            | 290.10, 290.09                                | F00, G30                                                                                                                                                  |                 |
| Vascular dementia                              | 293.09, 293.19                                | F01                                                                                                                                                       |                 |
| Other dementia                                 | 094.19, 290.11-290.19                         | F02-F03, F10.73-F19.73, G23.1, G31.0A, G31.0B, G31.1, G31.8B, G31.8E, G31.85                                                                              |                 |
| <b>Exclusion criteria</b>                      |                                               |                                                                                                                                                           |                 |
| PE and/or DVT within 90 days before index date |                                               |                                                                                                                                                           |                 |
| Valvular AF                                    |                                               |                                                                                                                                                           |                 |
| Mitral stenosis                                |                                               | I05                                                                                                                                                       |                 |
| Mechanical heart valve                         |                                               | Z952 Z953 Z954                                                                                                                                            |                 |
| Ischemic stroke                                | 433-434                                       | I63                                                                                                                                                       |                 |
| Hemorrhagic stroke/intracerebral bleeding      | 430 431                                       | I60 I61 I62                                                                                                                                               |                 |
| Unspecified stroke                             | 436                                           | I64                                                                                                                                                       |                 |
| Transient ischemic disease                     | 43509 43599                                   | G45                                                                                                                                                       |                 |
| other cerebrovascular disease                  | 432, 437, 438                                 | I62, 165-169, G46                                                                                                                                         |                 |
| Traumatic intracranial bleeding                |                                               | S063C S064 S065 S066                                                                                                                                      |                 |
| Hemiplegia                                     | 344                                           | G81, G82                                                                                                                                                  |                 |
| Dementia                                       | 094.19, 290.09-290.19, 292.09, 293.09, 293.19 | F00-F03, G30, F1x.73 series (F10.73, F1173, F1273, F1373, F1473, F1573, F1673, F1873-F19.73), G23.1, G31.0, G31.0A, G31.0B, G31.1, G31.8B, G31.8E, G31.85 |                 |
| Cognitive impairment                           | -                                             | F06                                                                                                                                                       |                 |
| Amnesic syndromes                              | 291.19                                        | F04, F04.9, F05.1, F10.6, F18.6, F19.6                                                                                                                    |                 |
| Head trauma                                    | 850.99, 851.29-854.99, 800.99-801.09, 803.99  | S06.0, S06.1-S06.9, S02.0-S02.1, S02.7, S02.9                                                                                                             |                 |

|                                                                        |                                                   |                                                                            |                                                   |
|------------------------------------------------------------------------|---------------------------------------------------|----------------------------------------------------------------------------|---------------------------------------------------|
| <b>Comorbidity (shared risk factors)</b>                               |                                                   |                                                                            |                                                   |
| <b>Underlying vascular diseases</b>                                    |                                                   |                                                                            |                                                   |
| Myocardial infarction                                                  | 410                                               | I21 I23                                                                    |                                                   |
| Heart failure                                                          | 42709 42710 42711<br>42719 42899 78249            | I110 I130 I132 I50                                                         |                                                   |
| Peripheral arterial disease                                            | 440 441 442 443 444 445                           | I702 I703 I704 I705 I706<br>I707 I708 I709 I71 I739<br>I74                 |                                                   |
| Diabetes                                                               | 24900 24909 25008<br>25009                        | E10 E11                                                                    | A10                                               |
| Hyperlipidemia /<br>hypercholesterolemia                               | 272.00-272.09<br>279.00<br>279.01                 | E780-E782<br>E784<br>E785                                                  |                                                   |
| Hypertension                                                           |                                                   |                                                                            | See specified<br>definition<br>below <sup>a</sup> |
| <b>Other comorbidities</b>                                             |                                                   |                                                                            |                                                   |
| Cancer                                                                 |                                                   | C                                                                          |                                                   |
| Renal disease                                                          |                                                   |                                                                            |                                                   |
| Bleeding                                                               |                                                   |                                                                            |                                                   |
| <b>Smoking-related diagnoses</b>                                       |                                                   |                                                                            |                                                   |
| Chronic pulmonary disease                                              | 490-493, 515-518                                  | J40-J47, J60-J67, J68.4,<br>J70.1                                          |                                                   |
| Diagnosis of problems related<br>to active smoking                     | -                                                 | Z720A, Z720E                                                               |                                                   |
| Smoking prevention<br>counselling or smoking<br>cessation intervention | -                                                 | <u>Treatment codes:</u><br>BQFT01, BQFS01                                  |                                                   |
| Current or former smoking<br>status                                    | -                                                 | <u>Administrative procedure<br/>codes:</u> ZZP01A1A,<br>ZZP01A1B2, ZZP0020 |                                                   |
| <b>Hospital diagnosed obesity</b>                                      | 277                                               | E65-E68                                                                    |                                                   |
| <b>Depression</b>                                                      | 296.09, 296.29, 296.99,<br>298.09, 300.49, 300.19 | F32, F33                                                                   |                                                   |
| <b>Substance abuse diagnoses<br/>and related comorbidities</b>         |                                                   |                                                                            |                                                   |
| <b>Drug-related abuse</b>                                              |                                                   |                                                                            |                                                   |
| Opioids                                                                | 304.09, 304.19                                    | F11.0-F11.9                                                                |                                                   |
| Cannabis                                                               | 304.59                                            | F12.0-F12.9                                                                |                                                   |
| Sedatives/hypnotics                                                    | 304.29, 304.39                                    | F13.0-F13.9                                                                |                                                   |
| Cocaine                                                                | 304.49                                            | F14.0-F14.9                                                                |                                                   |
| Other stimulants                                                       | 304.69                                            | F15.0-F15.9                                                                |                                                   |
| Hallucinogens                                                          | 304.79                                            | F16.0-F16.9                                                                |                                                   |
| Other and multiple drugs                                               | 304.89, 304.99                                    | F18.0-F19.9                                                                |                                                   |
| <b>Alcohol-related abuse</b>                                           |                                                   |                                                                            |                                                   |

|                                                      |                                |                                                              |                                                                                          |
|------------------------------------------------------|--------------------------------|--------------------------------------------------------------|------------------------------------------------------------------------------------------|
| Alcohol psychosis, and alcohol abuse syndrome        | 291.09-291.99, 303.09-303.99   | F10.2-F10.9                                                  |                                                                                          |
| Alcohol related diseases                             | 571.09, 571.10, 577.10, 979.59 | G31.2, G62.1, G72.1, I42.6, K29.2, K70, K86.0, T50.0A, Z72.1 |                                                                                          |
| <b>Co-medications</b>                                |                                |                                                              |                                                                                          |
| Diabetes mellitus                                    |                                |                                                              | A10                                                                                      |
| Clopidogrel                                          |                                |                                                              | B01AC04                                                                                  |
| Aspirin                                              |                                |                                                              | B01AC06                                                                                  |
| Thienopyridines (clopidogrel, ticagrelor, prasugrel) |                                |                                                              | B01AC04<br>B01AC24<br>B01AC22                                                            |
| Loop diuretics                                       |                                |                                                              | C03C                                                                                     |
| Digoxin                                              |                                |                                                              | C01AA05                                                                                  |
| Dronedarone                                          |                                |                                                              | C01BD07                                                                                  |
| Hypertension                                         |                                |                                                              | C02                                                                                      |
| Non-loop diuretics                                   |                                |                                                              | C02DA C02L<br>C03A C03B<br>C03D C03E<br>C03X C07C<br>C07D C08G<br>C09BA C09DA<br>C09XA52 |
| Congestive heart failure                             |                                |                                                              | C03C                                                                                     |
| Beta blocker                                         |                                |                                                              | C07                                                                                      |
| Calcium channel blocker                              |                                |                                                              | C07F C08<br>C09BB C09DB                                                                  |
| Verapamil                                            |                                |                                                              | C08DA01                                                                                  |
| Renin-angiotensin inhibitor (ARB or ACE inhibitor)   |                                |                                                              | C09                                                                                      |
| Statins                                              |                                |                                                              | C10                                                                                      |
| NSAIDs                                               |                                |                                                              | M01A                                                                                     |
| <b>Dementia medications</b>                          |                                |                                                              |                                                                                          |
| Anti-dementia medications                            |                                |                                                              | N06D                                                                                     |
| Donepezil                                            |                                |                                                              | N06DA02                                                                                  |
| Rivastigmin                                          |                                |                                                              | N06DA03                                                                                  |
| Galantamin                                           |                                |                                                              | N06DA04                                                                                  |
| Memantin                                             |                                |                                                              | N06DX01                                                                                  |

<sup>a</sup>We identified subjects with hypertension from combination treatment with at least two of the following classes of antihypertensive drugs:

I- Alpha adrenergic blockers (C02A, C02B, C02C)

II- Non-loop diuretics (C02DA, C02L, C03A, C03B, C03D, C03E, C03X, C07C, C07D, C08G, C09BA, C09DA, C09XA52)

III- Vasodilators (C02DB, C02DD, C02DG, C04, C05)

IV- Beta blockers (C07)

V- Calcium channel blockers (C07F, C08, C09BB, C09DB)

VI- Renin-angiotensin system inhibitors (C09)

**Table S2. Risk score definitions.**

| Risk score                                                                              | Points<br>if present |
|-----------------------------------------------------------------------------------------|----------------------|
| <b>CHA<sub>2</sub>DS<sub>2</sub>VASc*</b>                                               |                      |
| Congestive heart failure or Left Ventricular Dysfunction                                | 1                    |
| Hypertension                                                                            | 1                    |
| Age ≥ 65 years                                                                          | 1                    |
| Age ≥ 75 years                                                                          | 1                    |
| Diabetes mellitus                                                                       | 1                    |
| Stroke (ischemic stroke, transient ischemic disease or systemic embolism)               | 2                    |
| Vascular disease (myocardial infarction, peripheral arterial disease, or aortic plaque) | 1                    |
| Sex category (female)                                                                   | 1                    |
| <b>HAS-BLED†</b>                                                                        |                      |
| Hypertension                                                                            | 1                    |
| Abnormal renal function                                                                 | 1                    |
| Abnormal hepatic function                                                               | 1                    |
| Stroke (ischemic stroke or transient ischemic attack)                                   | 1                    |
| Bleeding                                                                                | 1                    |
| Labile international normalized ratio‡                                                  | 1                    |
| Elderly age (≥ 65 years)                                                                | 1                    |
| Drugs (aspirin, clopidogrel, or non-steroidal anti-inflammatory drugs)                  | 1                    |
| Alcohol intake                                                                          | 1                    |

\*Reflects stroke risk in atrial fibrillation patients not in anticoagulant therapy (Lip GYH, Nieuwlaat R, Pisters R, Lane DA, Crijns HJGM. Refining clinical risk stratification for predicting stroke and thromboembolism in atrial fibrillation using a novel risk factor-based approach: the euro heart survey on atrial fibrillation. (Chest 2010;137:263-72)

†Reflects bleeding risk in atrial fibrillation patients undergoing anticoagulant therapy (Pisters R, Lane DA, Nieuwlaat R, de Vos CB, Crijns HJGM, Lip GYH. A novel user-friendly score (HAS-BLED) to assess 1-year risk of major bleeding in patients with atrial fibrillation: the Euro Heart Survey. Chest 2010;138:1093-100).

‡Not included due to unavailable information

**Table S3. Definition of Charlson Comorbidity Index.**

| <b>Weight</b> | <b>Condition</b>                 | <b>ICD-10</b>                                                                                                    | <b>ICD-8</b>                                                                     |
|---------------|----------------------------------|------------------------------------------------------------------------------------------------------------------|----------------------------------------------------------------------------------|
| 1             | Myocardial infarction            | I21 I22 I23                                                                                                      | 410                                                                              |
| 1             | Congestive heart failure         | I50 I110 I130 I132                                                                                               | 42709 42710 42711<br>42719 42899 78249                                           |
| 1             | Peripheral vascular disease      | I70 I71 I72 I73 I74 I77                                                                                          | 440 441 442 443 444<br>445                                                       |
| 1             | Cerebrovascular disease          | I60 I61 I62 I63 I64 I65 I66<br>I67 I68 I69 G45 G46                                                               | 430 431 432 433 434<br>435 436 437 438                                           |
| 1             | Dementia                         | F00 F01 F02 F03 F051 G30                                                                                         | 29009 29010 29011<br>29012 29013 29014<br>29015 29016 29017<br>29018 29019 29309 |
| 1             | Chronic pulmonary disease        | J40 J41 J42 J43 J44 J45 J46<br>J47 J60 J61 J62 J63 J64 J65<br>J66 J67 J684 J701 J703 J841<br>J920 J961 J982 J983 | 490 491 492 493 515<br>516 517 518                                               |
| 1             | Connective tissue disease        | M05 M06 M08 M09 M30<br>M31 M32 M33 M34 M35<br>M36 D86                                                            | 712 716 734 446<br>13599                                                         |
| 1             | Ulcer disease                    | K221 K25 K26 K27 K28                                                                                             | 53091 53098 531 532<br>533 534                                                   |
| 1             | Mild liver disease               | B18 K700 K701 K702 K703<br>K709 K71 K73 K74 K760                                                                 | 571 57301 57304                                                                  |
| 1             | Diabetes Mellitus                | E10 E11 E12 E13 E14 O240<br>O241 O242 O243 O245<br>O246 O247 O248 O249<br>H360                                   | 249 250                                                                          |
| 2             | Hemiplegia                       | G81 G82                                                                                                          | 344                                                                              |
| 2             | Moderate to severe renal disease | I12 I13 N00 N01 N02 N03<br>N04 N05 N07 N11 N14 N17<br>N18 N19 Q61                                                | 403 404 580 581 582<br>583 584 59009 59319<br>7531 792                           |

|   |                                     |                                                                             |                                                                                  |
|---|-------------------------------------|-----------------------------------------------------------------------------|----------------------------------------------------------------------------------|
| 2 | Diabetes with chronic complications | E102 E103 E104 E105 E106<br>E107 E108 E112 E113 E114<br>E115 E116 E117 E118 | 24901 24902 24903<br>24904 24905 24908<br>25001 25002 25003<br>25004 25005 25008 |
| 2 | Any tumor                           | C0 C1 C2 C3 C4 C5 C6 C70<br>C71 C72 C73 C74 C75                             | 14 15 16 17 18 190<br>191 192 193194                                             |
| 2 | Leukemia                            | C91 C92 C93 C94 C95                                                         | 204 205 206 207                                                                  |
| 2 | Lymphoma                            | C81 C82 C83 C84 C85 C88<br>C90 C96                                          | 200 201 202 203<br>27559                                                         |
| 3 | Moderate to severe liver disease    | B150 B160 B162 B190 K704<br>K72 K766 I85                                    | 07000 07002 07004<br>07006 07008 57300<br>4560                                   |
| 6 | Metastatic solid tumor              | C76 C77 C78 C79 C80                                                         | 195 196 197 198 199                                                              |
| 6 | AIDS                                | B21 B22 B23 B24                                                             | 07983                                                                            |

Charlson ME, Pompei P, Ales KL, MacKenzie CR. A new method of classifying prognostic comorbidity in longitudinal studies: development and validation. *J Chronic Dis* 1987; 40: 373–383.

**Table S4. Patient characteristics by age at time of index oral anticoagulant prescription claim and at the 180-day landmark before propensity-weighting.**

| Characteristic, % (N)                                  | 60-69 years |                  | 70-79 years |                  | 80 years and older |                  |
|--------------------------------------------------------|-------------|------------------|-------------|------------------|--------------------|------------------|
|                                                        | Index       | 180-day landmark | Index       | 180-day landmark | Index              | 180-day landmark |
| N                                                      | 11052       | 11052            | 13237       | 13237            | 9328               | 9328             |
| Female sex                                             | 37.0 (4085) | 37.0 (4085)      | 45.7 (6046) | 45.7 (6046)      | 59.8 (5581)        | 59.8 (5581)      |
| Mean age (sd)*                                         | 65.9 (2.7)  | 65.9 (2.7)       | 74.8 (2.9)  | 74.8 (2.9)       | 85.6 (4.1)         | 85.6 (4.1)       |
| Mean CHA <sub>2</sub> DS <sub>2</sub> -VASc score (sd) | 2.1 (1.2)   | 2.3 (1.2)        | 3.1 (1.3)   | 3.3 (1.3)        | 4.0 (1.1)          | 4.1 (1.2)        |
| Mean HAS-BLED score (sd)                               | 1.9 (1.0)   | 2.1 (1.0)        | 2.4 (0.9)   | 2.5 (0.9)        | 2.5 (0.9)          | 2.5 (0.9)        |
| Mean Charlson Comorbidity score (sd)                   | 0.8 (1.4)   | 0.8 (1.4)        | 1.1 (1.5)   | 1.1 (1.5)        | 1.2 (1.6)          | 1.2 (1.6)        |
| Myocardial infarction*                                 | 9.1 (1011)  | 9.5 (1047)       | 12.0 (1587) | 12.4 (1648)      | 14.2 (1320)        | 14.7 (1367)      |
| Heart failure*                                         | 13.0 (1440) | 26.0 (2868)      | 17.2 (2276) | 33.1 (4382)      | 29.0 (2708)        | 50.5 (4709)      |
| Peripheral arterial disease*                           | 5.3 (586)   | 6.0 (659)        | 8.5 (1120)  | 9.1 (1210)       | 9.0 (839)          | 9.8 (912)        |
| Vascular disease*                                      | 13.4 (1478) | 14.2 (1570)      | 18.4 (2436) | 19.4 (2564)      | 20.9 (1953)        | 22.0 (2051)      |
| Diabetes*                                              | 12.1 (1342) | 13.4 (1478)      | 12.1 (1600) | 13.2 (1745)      | 10.9 (1013)        | 11.5 (1069)      |
| Hyperlipdemia*                                         | 13.9 (1534) | 15.8 (1744)      | 15.4 (2042) | 16.8 (2228)      | 11.5 (1075)        | 12.3 (1151)      |
| Hypertension*                                          | 59.1 (6533) | 66.2 (7312)      | 63.2 (8366) | 68.6 (9074)      | 66.5 (6207)        | 70.6 (6585)      |
| Cancer                                                 | 3.7 (412)   | 5.2 (576)        | 5.8 (773)   | 8.0 (1053)       | 5.9 (548)          | 8.5 (794)        |
| Chronic pulmonary disease                              | 11.2 (1240) | 12.5 (1381)      | 16.0 (2119) | 17.6 (2326)      | 16.4 (1534)        | 17.9 (1670)      |
| Liver disease                                          | 0.4 (40)    | 0.4 (45)         | 0.3 (36)    | 0.3 (41)         | 0.2 (17)           | 0.2 (19)         |
| Renal dysfunction                                      | 4.1 (453)   | 4.8 (532)        | 5.8 (774)   | 7.0 (921)        | 6.7 (622)          | 8.1 (755)        |
| Prior bleeding                                         | 9.6 (1065)  | 10.9 (1201)      | 12.9 (1709) | 14.5 (1920)      | 14.9 (1393)        | 16.7 (1558)      |
| Depression                                             | 1.3 (144)   | 1.4 (156)        | 1.5 (205)   | 1.7 (225)        | 2.5 (235)          | 3.0 (284)        |
| Hospital diagnosed obesity                             | 9.8 (1078)  | 10.8 (1195)      | 7.8 (1030)  | 8.3 (1095)       | 4.8 (444)          | 4.9 (460)        |
| Smoking-related diagnoses*                             | 4.4 (486)   | 5.3 (587)        | 4.7 (620)   | 6.1 (811)        | 3.1 (293)          | 4.3 (399)        |
| Alcohol-related abuse*                                 | 4.4 (483)   | 4.6 (505)        | 2.8 (372)   | 3.0 (391)        | 1.1 (104)          | 1.2 (112)        |



|                             |             |             |             |              |             |             |
|-----------------------------|-------------|-------------|-------------|--------------|-------------|-------------|
| Drug-related abuse*         | 0.2 (17)    | 0.2 (17)    | 0.2 (22)    | 0.2 (23)     | 0.2 (14)    | 0.2 (14)    |
| Clopidogrel                 | 3.0 (330)   | 5.0 (554)   | 3.9 (522)   | 6.7 (881)    | 4.6 (426)   | 7.0 (657)   |
| Aspirin                     | 36.0 (3981) | 37.4 (4132) | 40.9 (5413) | 41.8 (5534)  | 46.2 (4314) | 46.0 (4294) |
| Loop diuretics              | 13.1 (1446) | 26.0 (2873) | 17.3 (2292) | 33.2 (4394)  | 29.1 (2713) | 50.5 (4713) |
| Non-loop diuretics          | 32.7 (3612) | 39.4 (4358) | 38.7 (5117) | 43.4 (5742)  | 43.2 (4028) | 47.4 (4417) |
| Digoxin                     | 4.2 (464)   | 22.1 (2443) | 5.3 (708)   | 25.3 (3354)  | 8.6 (798)   | 34.0 (3171) |
| Beta blocker                | 41.9 (4630) | 82.4 (9111) | 40.2 (5322) | 80.0 (10586) | 40.7 (3792) | 75.3 (7024) |
| Calcium channel blocker     | 27.9 (3089) | 32.4 (3580) | 31.6 (4185) | 35.0 (4627)  | 34.5 (3214) | 36.3 (3390) |
| Verapamil                   | 3.4 (379)   | 6.6 (729)   | 2.6 (341)   | 5.0 (663)    | 2.4 (221)   | 3.7 (344)   |
| Renin-angiotensin inhibitor | 44.6 (4933) | 54.8 (6055) | 47.4 (6269) | 55.8 (7385)  | 47.8 (4455) | 54.4 (5070) |
| Statins                     | 36.0 (3984) | 42.8 (4734) | 40.5 (5363) | 45.4 (6009)  | 32.0 (2986) | 34.5 (3222) |

\*Included in the propensity score

**Table S5. Crude and weighed hazard ratios for the association between exposure and falsification endpoints.**

| <b>Falsification endpoint</b>  | <b>60-69 years<br/>Hazard ratio (95% CI)</b> | <b>70-79 years<br/>Hazard ratio (95% CI)</b> | <b>80 years and older<br/>Hazard ratio (95% CI)</b> |
|--------------------------------|----------------------------------------------|----------------------------------------------|-----------------------------------------------------|
| <b>Pneumonia</b>               |                                              |                                              |                                                     |
| Crude analysis                 | 0.79 (0.69-0.91)                             | 0.91 (0.82-1.01)                             | 0.97 (0.88-1.06)                                    |
| Weighted analysis              | 0.83 (0.72– 0.96)                            | 0.97 (0.87– 1.07)                            | 0.96 (0.87– 1.06)                                   |
| <b>Urinary tract infection</b> |                                              |                                              |                                                     |
| Crude analysis                 | 0.92 (0.84-1.01)                             | 0.89 (0.82-0.96)                             | 1.07 (0.99-1.16)                                    |
| Weighted analysis              | 0.92 (0.83– 1.01)                            | 0.88 (0.82– 0.95)                            | 1.01 (0.93– 1.09)                                   |

**Figure S1.** Change in patient characteristics by age from the time of index oral anticoagulant prescription claim (day 0) to the 180-day landmark before propensity-weighting visualized by signed standardized differences.

**Patients aged 60-69 years**

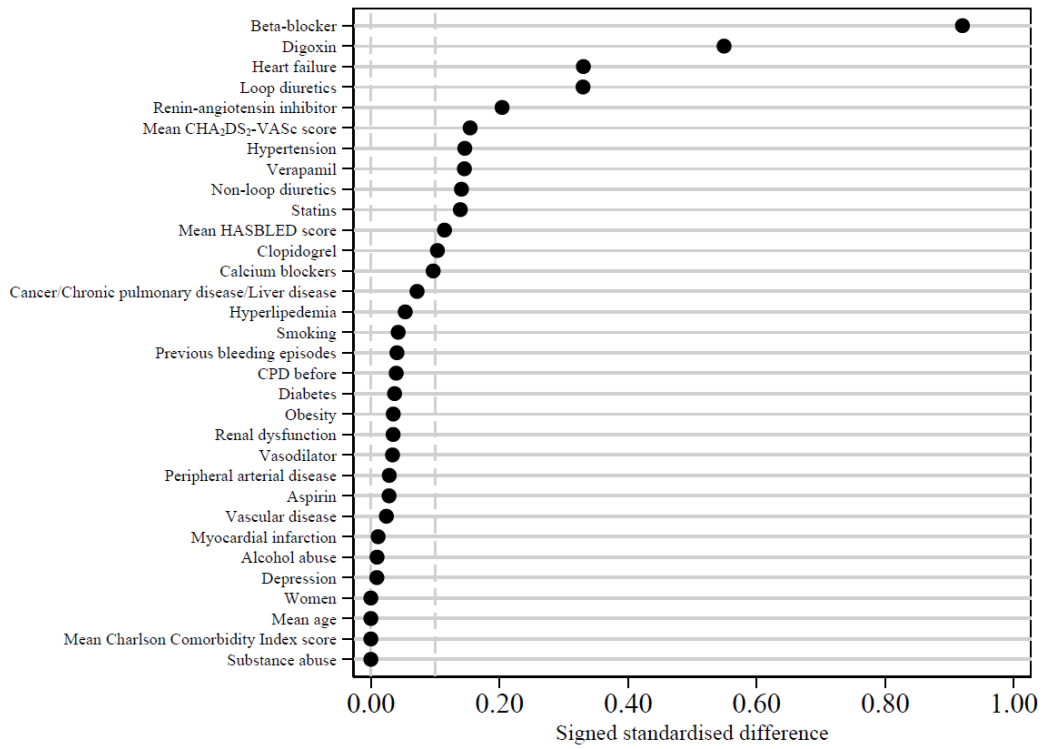

## Patients aged 70-79 years

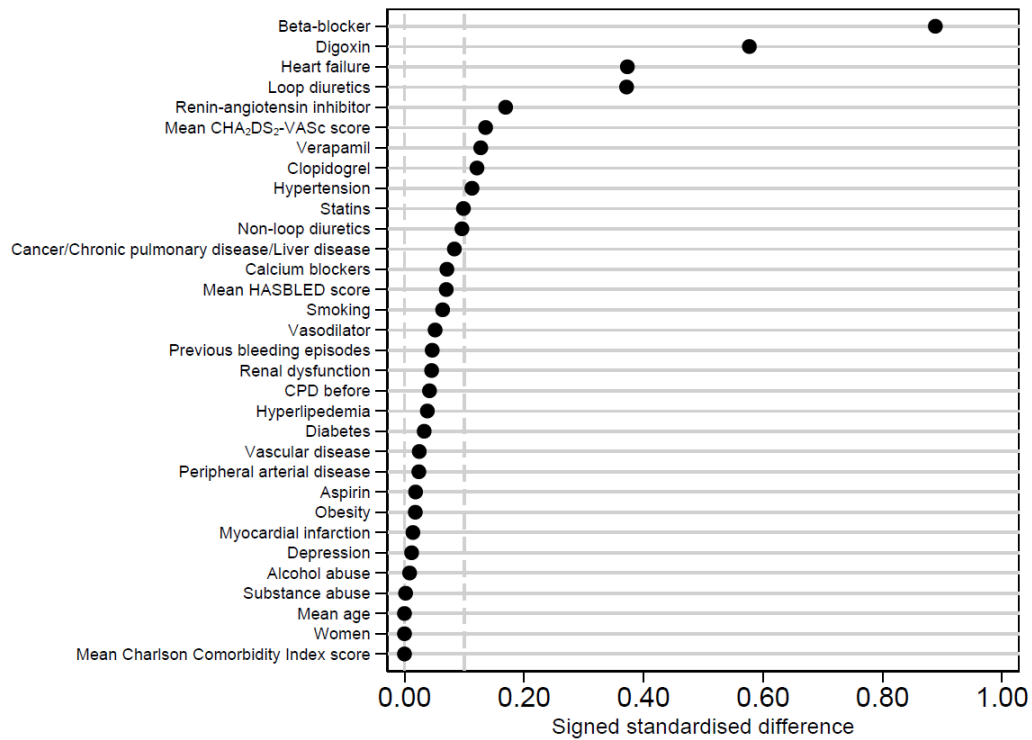

## Patients aged 80 years and older

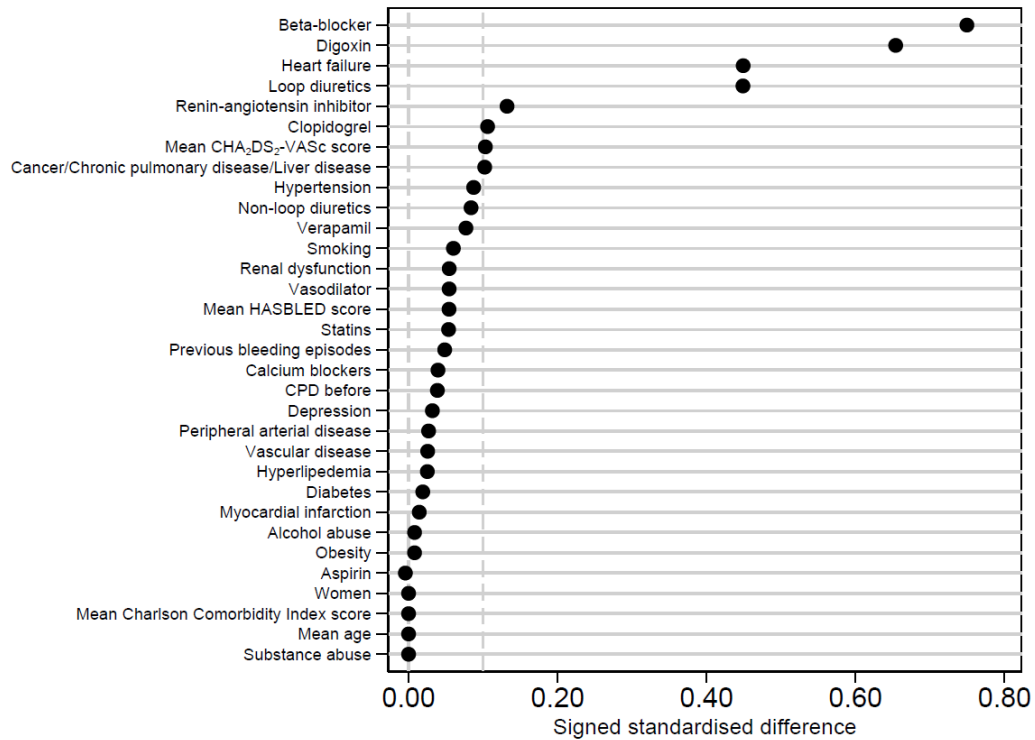

**Figure S2.** Plot of maximum of pairwise standardized differences for patient characteristics of NOAC users and warfarin users at the 180-day landmark stratified by age before and after applying propensity weights (IPTW).

**Patients aged 60-69 years**

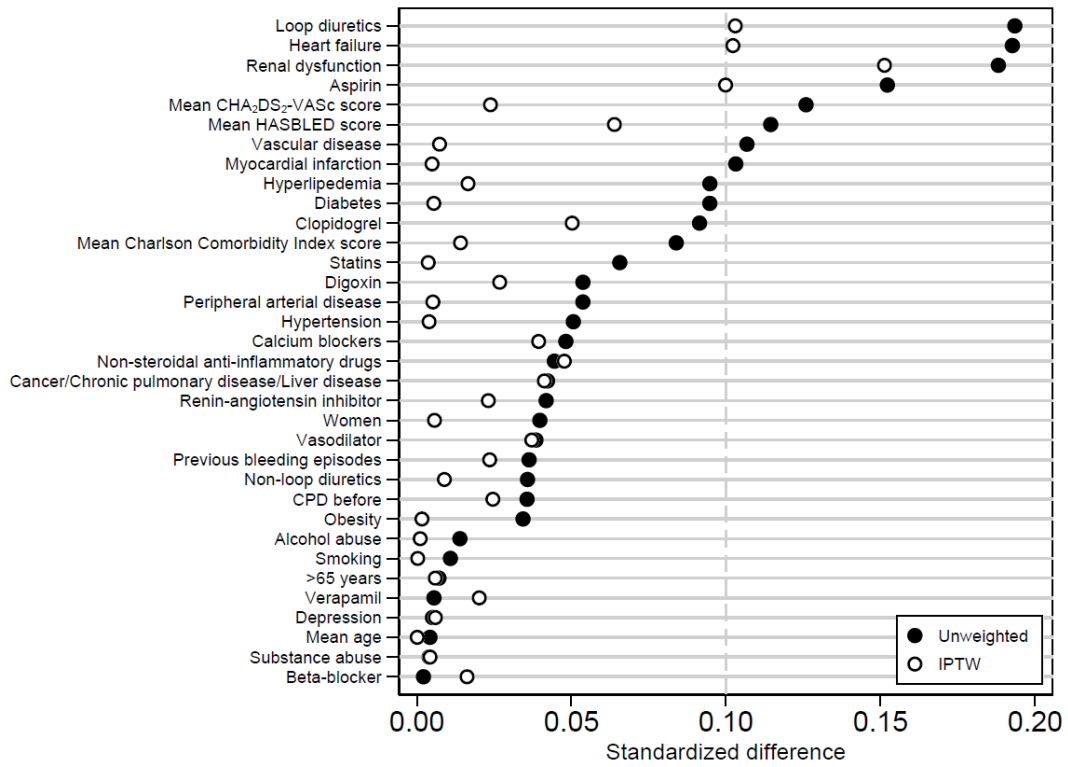

## Patients aged 70-79 years

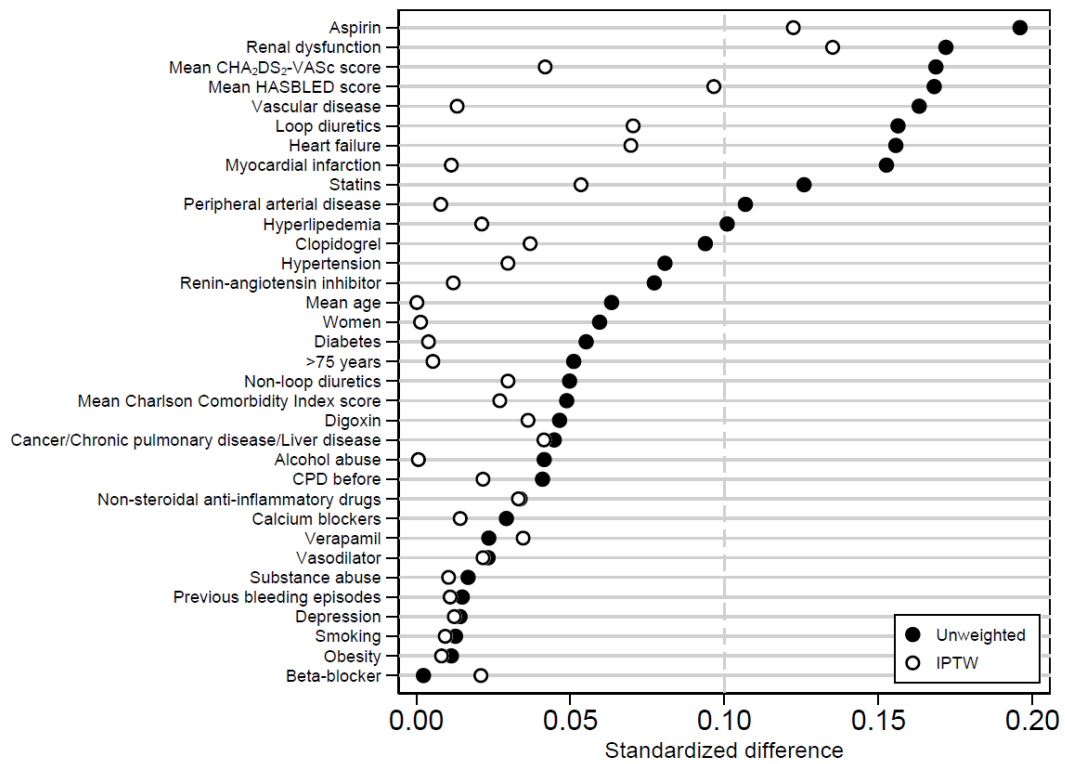

## Patients aged 80 years and older

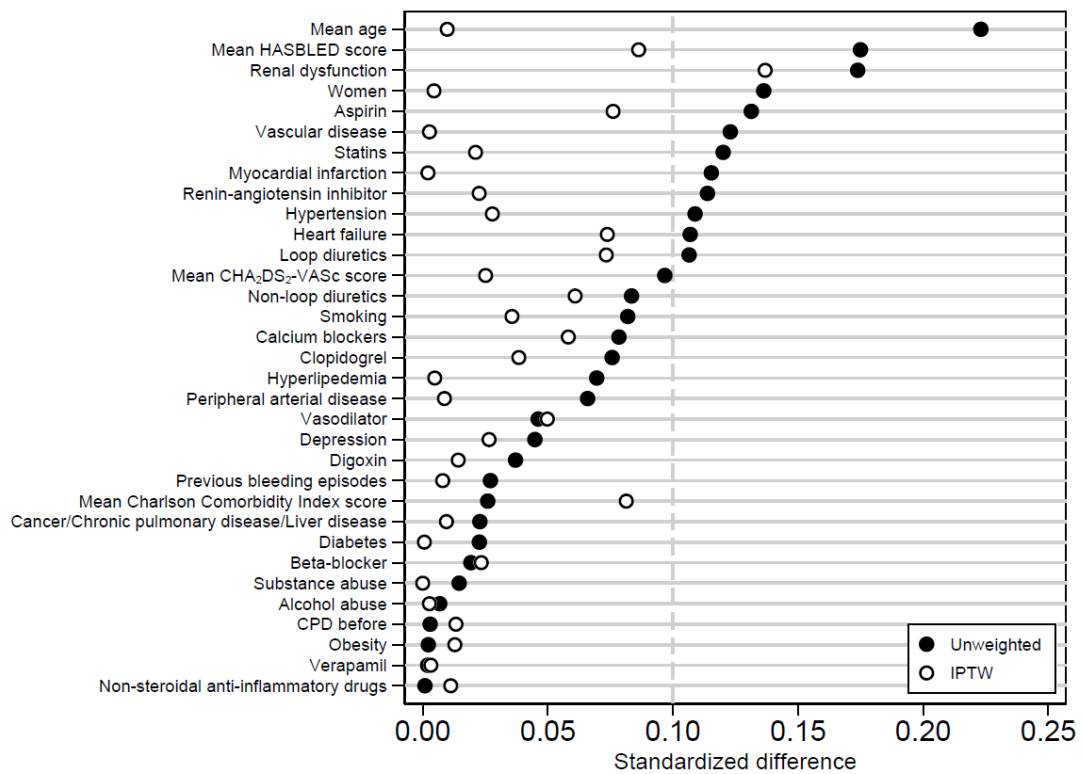

**Figure S3.** Propensity score distributions for warfarin and NOAC by age group. Overall

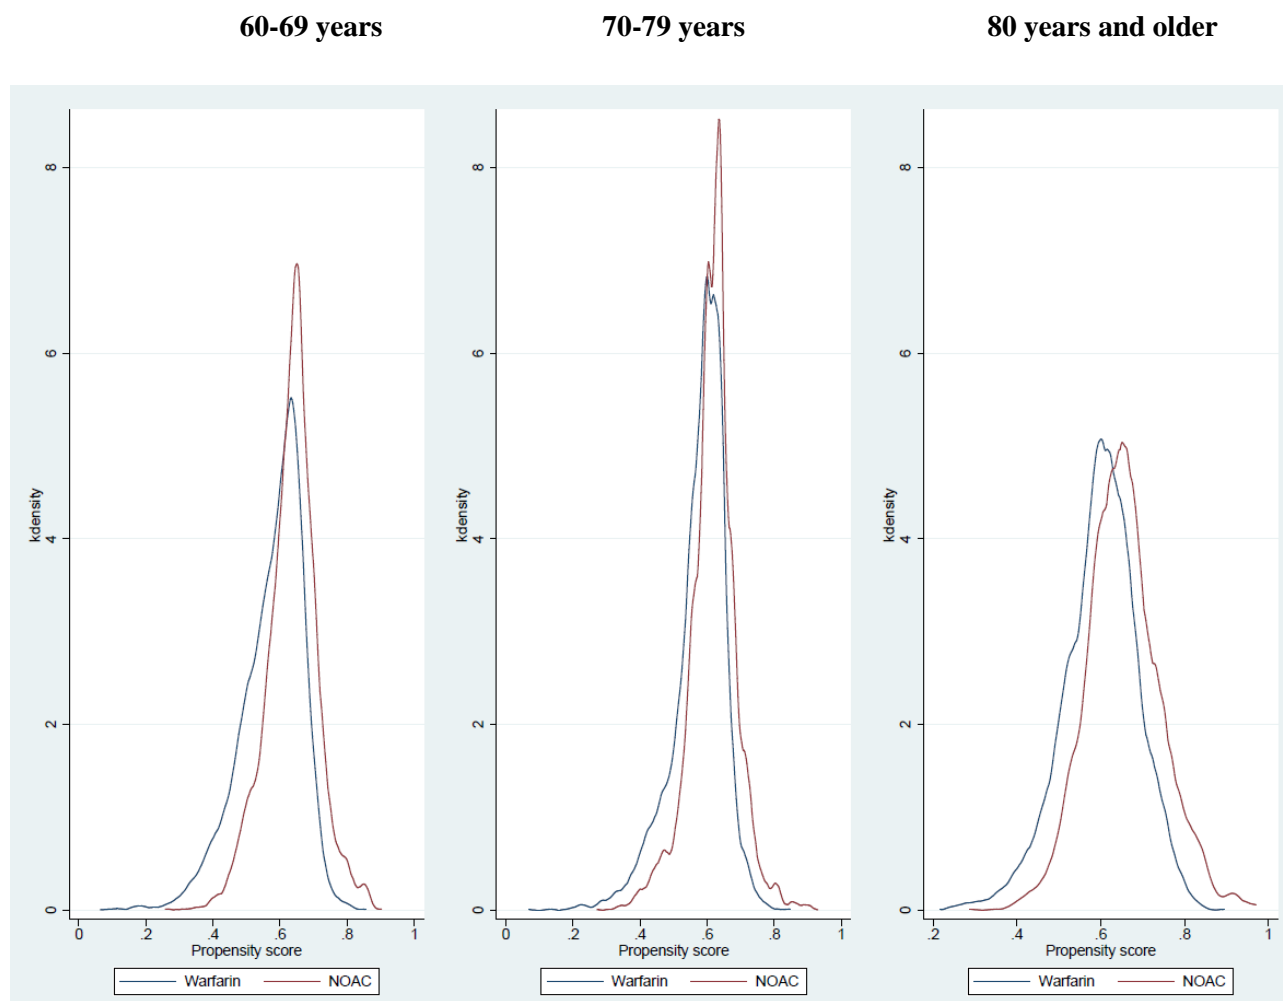

Standard dose NOAC

60-69 years

70-79 years

80 years and older

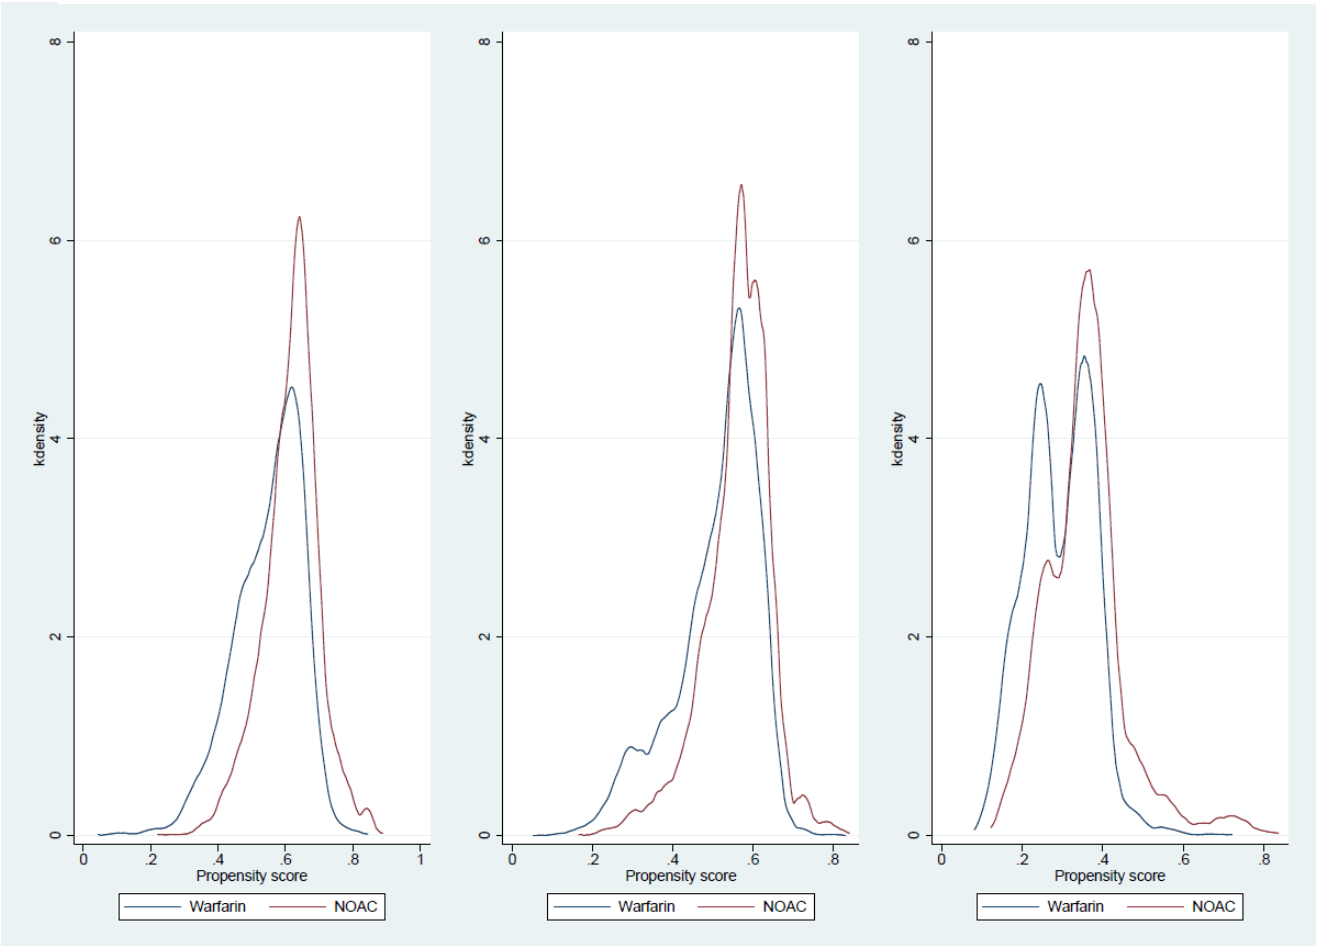



Reduced dose NOAC

**60-69 years**

**70-79 years**

**80 years and older**

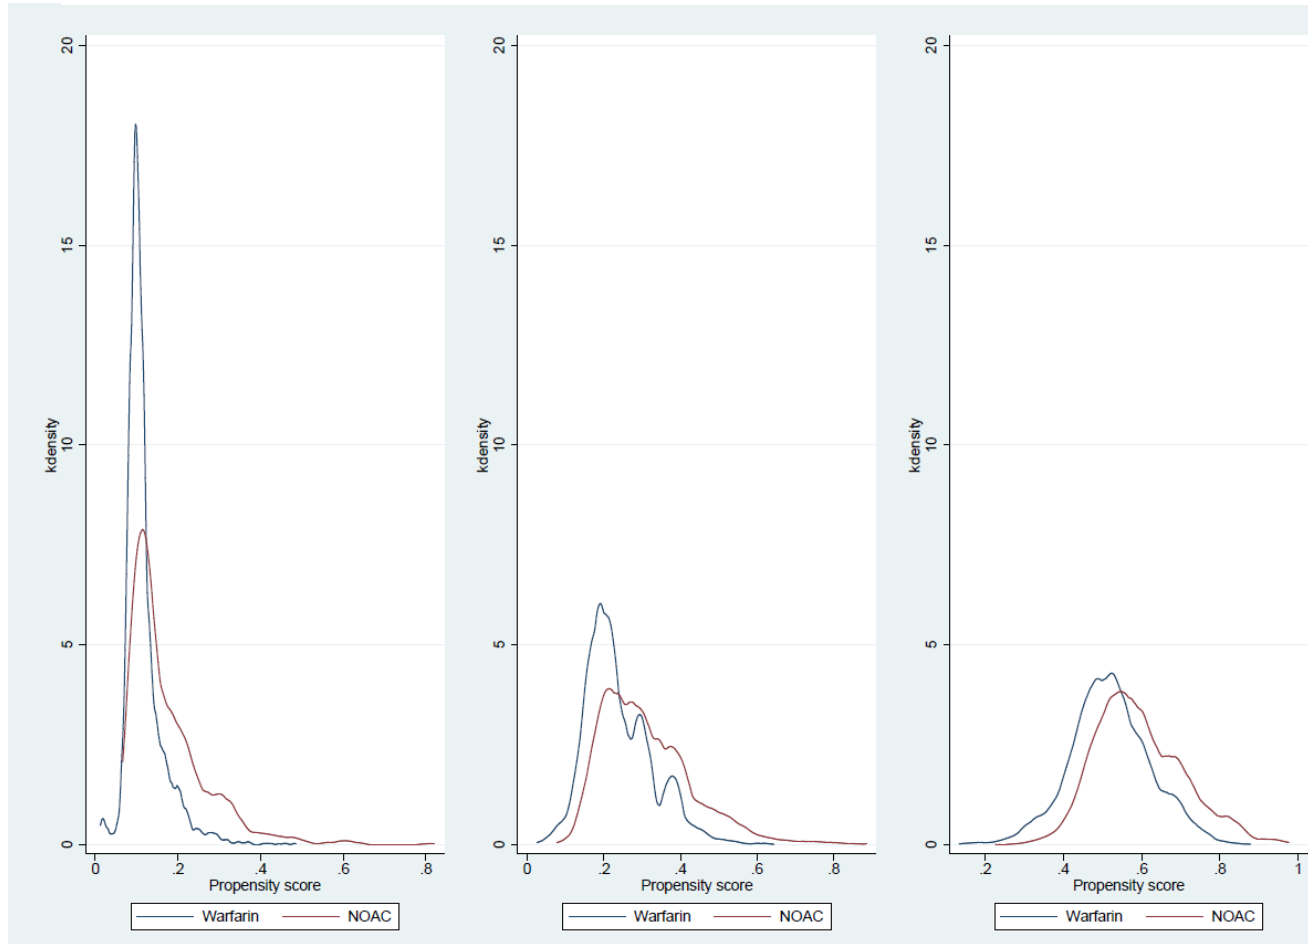

Supplement: JAH3-8-e011358-s001.pdf [file JAH3-8-e011358-s001.pdf]
